# Supplementary material for: Preparation and compatibility mechanism study of the polyurethane-polysiloxane copolymer with tunable polysiloxane content for TPU/MVQ blends with comfortable texture
Source: Royal Society of Chemistry journal article supplement (doi:10.1039/d3py00157a), 2023-01-01
Supplement: d3py00157a1.pdf [file d3py00157a1.pdf]

## Supporting Information

# Preparation and compatibility mechanism study of the polyurethane-polysiloxane copolymer with tunable polysiloxane content for the TPU/MVQ blends with comfortable human touch

*Gege Lv<sup>1,1</sup>, Jing Hu<sup>1,1,4</sup>, Xinyue Hao<sup>1</sup>, Nanying Ning<sup>1,2,3</sup>, Bing Yu<sup>1,2,3\*</sup>, Ming Tian<sup>1,2,3\*</sup>*

1. State Key Laboratory of Organic-Inorganic Composites, Beijing University of Chemical Technology, Beijing 100029, China;
2. Beijing Advanced Innovation Center for Soft Matter Science and Engineering, Beijing University of Chemical Technology, Beijing 100029, China;
3. Key Laboratory of Carbon Fiber and Functional Polymers, Ministry of Education, Beijing University of Chemical Technology, Beijing 100029, China;
4. Shenyang Medical College, Shenyang 110034, China;

---

\*Corresponding authors. Tel.: 86 10 64456158, Fax:86 10 64433964.

E-mail addresses: [tianm@mail.buct.edu.cn](mailto:tianm@mail.buct.edu.cn) (M. Tian), [yubing@mail.buct.edu.cn](mailto:yubing@mail.buct.edu.cn) (B. Yu)

## Characterization Synthesis and text

*The FTIR structure characterization of different PDMS content compatibilizers.* The FTIR spectra of compatibilizers are shown in *Figure S1*. Through the FTIR spectrogram normalization of -NHCOO-, the characteristic peak of -Si-O-Si- appeared at  $1084\text{ cm}^{-1}$ , and the telescopic vibration peak of -Si-C- appeared at  $800\text{ cm}^{-1}$  and  $1189\text{ cm}^{-1}$ , indicating that the PDMS segment successfully reacted with MDI. There was no obvious feature peak at  $2250\text{--}2280\text{ cm}^{-1}$  in the FTIR spectrogram of the compatibilizer, which is the absorption peak position of the -NCO in MDI, indicating that -NCO was fully reacted with -OH group in PTMG and PDMS. Meanwhile, it was found that the vibration peak of -Si-C- exhibited a significant enhancement, which verified the increase of PDMS content from PU-PDMS-20% to PU-PDMS-100%.

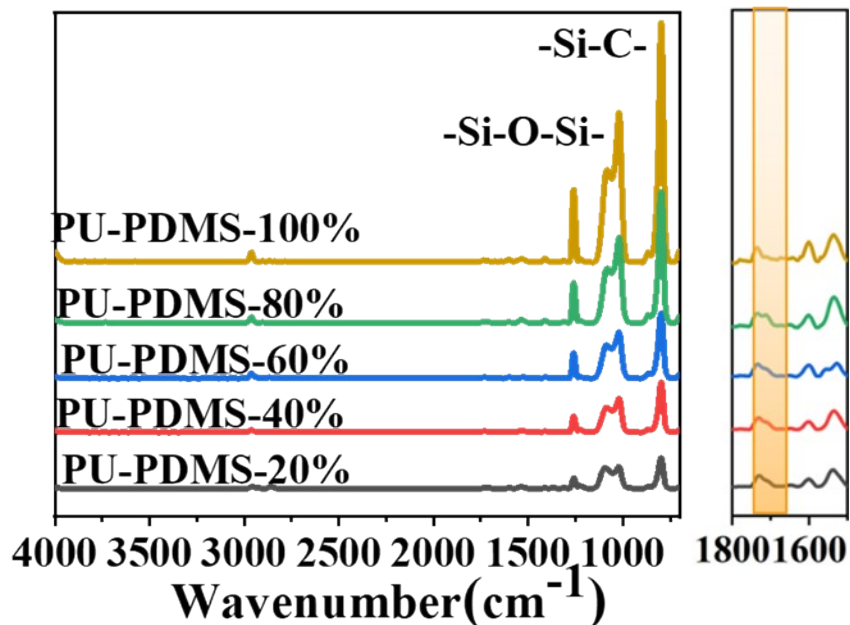

**Figure S1.** The FTIR spectra of different PDMS content compatibilizers

*The  $^1\text{H}$  NMR structure characterization of different PDMS content compatibilizers.*  $^1\text{H}$  NMR spectrum was also applied here to prove the structure of different PDMS content compatibilizers. As shown in **Figure S2**, according to the  $^1\text{H}$  NMR spectra of the compatibilizers with different PDMS content, the characteristic peak of -NH was observed at about 1.90 ppm, indicating the successful synthesis of the reaction. At the same time, the content of PDMS segment in the compatibilizers can be verified by the -Si- $\text{CH}_3$  signals, which was calculated by normalizing the  $^1\text{H}$  NMR spectra, and the actual content of PDMS segment was obtained, which confirmed the increase of PDMS content. The actual PDMS content of PU-PDMS (marked as m) is obtained via the integral area of the corresponding signals:

$$m = \frac{n_{PDMS}}{n_{PDMS} + n_{PTMG}} = \frac{S_3/4}{S_1/12} * 100\%$$

The actual PDMS content in PU-PDMS copolymer was increased with PDMS monomer in feed.

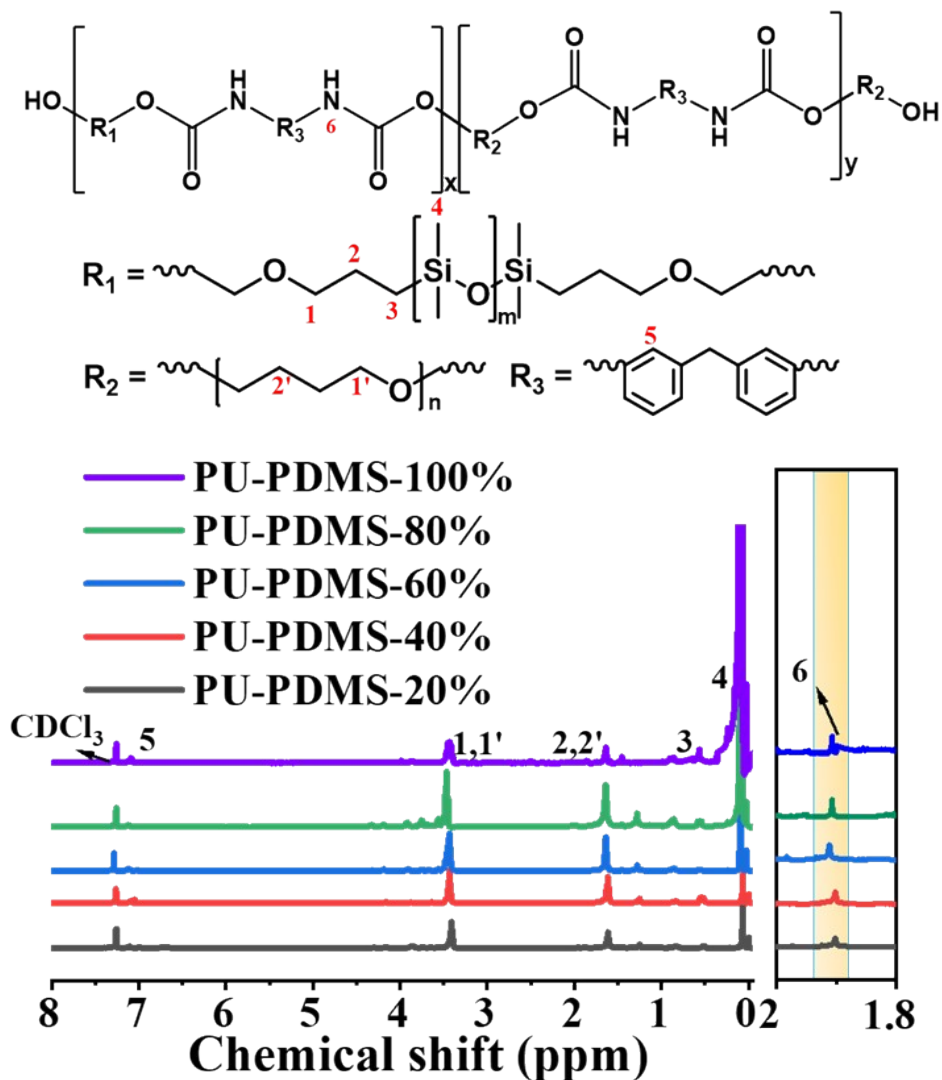

**Figure S2.** The <sup>1</sup>H NMR spectra of different PDMS content compatibilizers

*The surface tension analysis of the polyurethane-polysiloxane compatibilizers with different PDMS content.* To determine the surface

tension ( $\gamma$ ) and wetting parameters ( $\omega$ ) of the compatibilizer in blends,<sup>1, 2</sup> the position of the compatibilizers in the blend as shown in **Figure S3**.

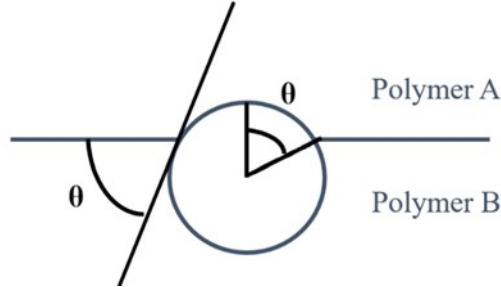

**Figure S3.** The position of the compatibilizers in the blend

The Harmonic Equations (Formula S1) can be used to estimate

$$\text{interfacial tension} \quad (1 + \cos \theta_{H_2O}) \gamma_{H_2O=4} \left( \frac{\gamma_{H_2O}^d \gamma^d}{\gamma_{H_2O}^d + \gamma^d} + \frac{\gamma_{H_2O}^p \gamma^p}{\gamma_{H_2O}^p + \gamma^p} \right)$$

$$(1 + \cos \theta_{C_2H_5OH}) \gamma_{C_2H_5OH=4} \left( \frac{\gamma_{C_2H_5OH}^d \gamma^d}{\gamma_{C_2H_5OH}^d + \gamma^d} + \frac{\gamma_{C_2H_5OH}^p \gamma^p}{\gamma_{C_2H_5OH}^p + \gamma^p} \right)$$

$\theta_{H_2O}$  and  $\theta_{C_2H_5OH}$  represent the contact angle of water and ethanol on MVQ and TPU samples.

$$\gamma = \gamma^d + \gamma^p \quad (\text{Formula S2})$$

$\gamma$  is the surface tension of MVQ or TPU, d is the non-polar component, and p is the polar component. The surface tension of water and ethylene glycol is substituted into the Formula S1 to calculate the surface tension of MVQ and TPU matrix.

$$\gamma_{12} = \gamma_1 + \gamma_2 - \frac{4\gamma_1^d \gamma_2^d}{\gamma_1^d + \gamma_2^d} - \frac{4\gamma_1^p \gamma_2^p}{\gamma_1^p + \gamma_2^p} \quad (\text{Formula S3})$$

$\gamma_1$  is the surface tension of MVQ,  $\gamma_2$  is the surface tension of TPU.  $\gamma^d$  and  $\gamma^p$  represent the non-polar and polar parts of the components of the polymer. The position of the compatibilizers in the blend can be determined by the wetting coefficient  $\omega$ :

$$\omega = \frac{\gamma_{\text{compatibilizer-MVQ}} - \gamma_{\text{compatibilizer-TPU}}}{\gamma_{\text{MVQ-TPU}}}$$

(Formula S4)

$\gamma_{\text{compatibilizer-TPU}}$ ,  $\gamma_{\text{compatibilizer-MVQ}}$ ,  $\gamma_{\text{MVQ-TPU}}$  represents the interface tension of the two phases of the compatibilizer-TPU, the compatibilizer-MVQ, and the TPU-MVQ. When  $\omega > 1$ , the compatibilizer is located in the TPU phase, when  $\omega < -1$ , the compatibilizer is located in the MVQ phase, when  $-1 < \omega < 1$ , the compatibilizer is located at the two-phase interface of the TPU/MVQ blend.

***The SEM micrographs obtained for blending at pure TPU/MVQ.*** The structure of the compatibilizer PU-PDMS plays a key role in adjusting the morphology of TPU/MVQ, the TPU/MVQ blend was prepared at a weight ratio of 7/3, in order to eliminate the influence of temperature, shear rate, blending time, and other processing conditions, the samples were prepared by the solution mixing as shown in ***Figure S4***.

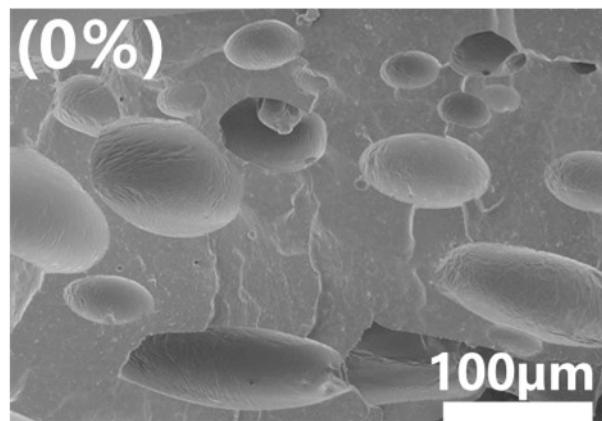

**Figure S4.** The SEM micrographs obtained for blending at TPU/MVQ without compatibilizer

*The average diameter of the MVQ phase in TPU/MVQ (7/3) compatibilized by PU-PDMS with varied PDMS content.* The structure of PU-PDMS was adjusted by varying the PDMS content from 20% to 100%, which was expected to orient at the interface and exhibited good compatibilization effect. In order to investigate the effect of synthetic PU-PDMS amphiphilic copolymer on the compatibilization of TPU/MVQ blends, the TPU/MVQ blends were prepared at a weight ratio of 7/3 with various amounts of PU-PDMS compatibilizers from 1 wt.% to 10 wt.% content. The average diameter of the MVQ phase of TPU/MVQ blends are shown in *Figure S5*.

### PU-PDMS-20%

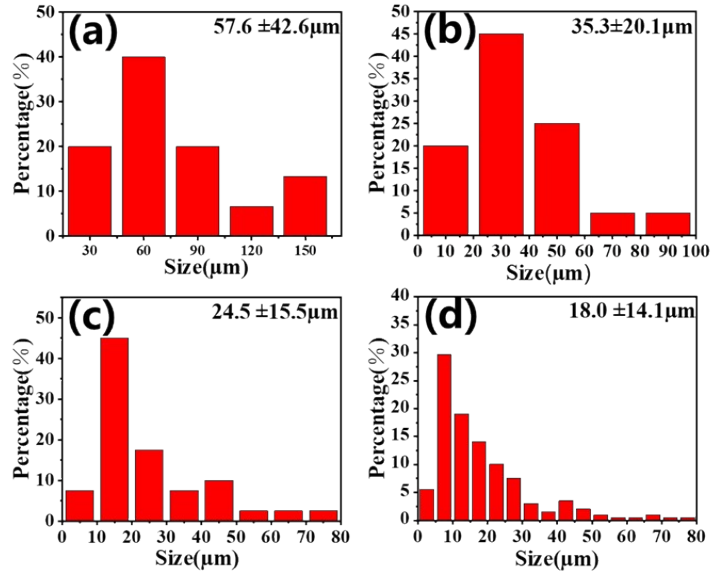

### PU-PDMS-80%

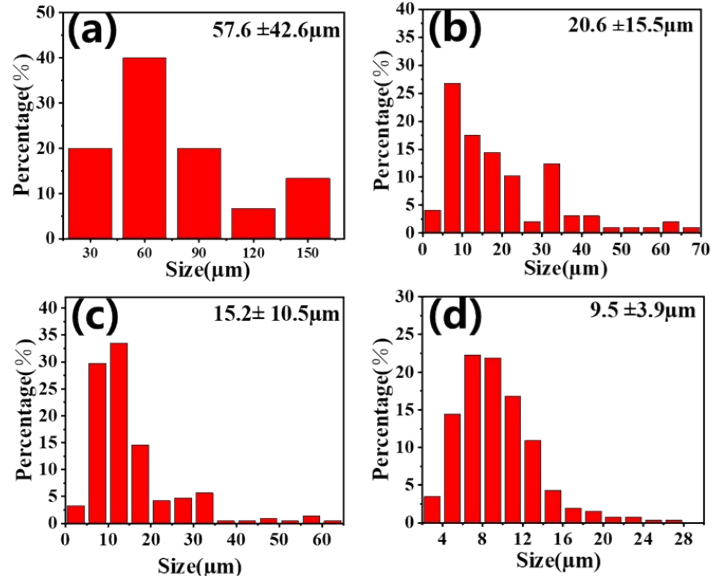



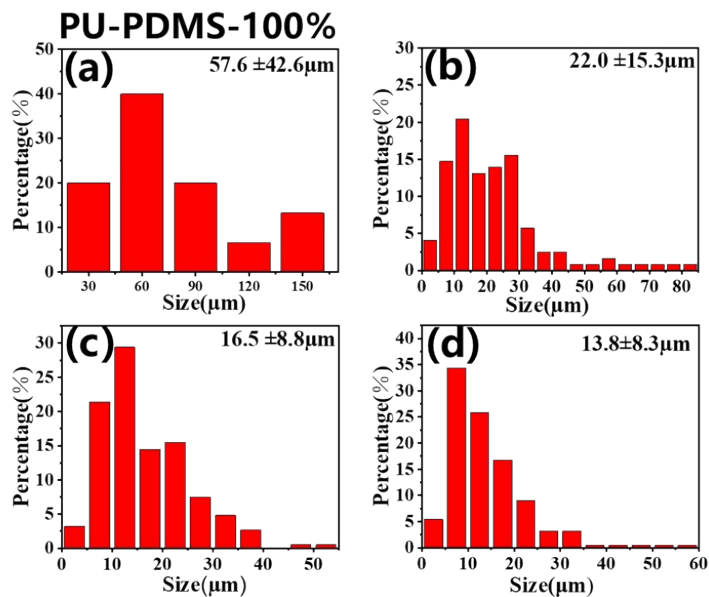

**Figure S5.** The dispersion phase size distribution of TPU/MVQ blends compatibilized by the compatibilizers with different PDMS content, (a), (b), (c), and (d) represent the amount of compatibilizers addition is 0%, 1%, 5%, and 10%, respectively. The blends were obtained by solution blending.

***The Mechanical properties of the TPU/MVQ blends compatibilized by the compatibilizers with different PDMS content.*** The interfacial adhesion is necessary for stress transfer to suppress crack at the interface.<sup>3</sup> As a result, the compatibility and the enhanced interfacial interactions can be reflected by the stress-strain curve of the blends. The effect of the structure of PU-PDMS on the mechanical properties of TPU/MVQ blends is investigated, which reflects the influence of varied PU-PDMS structure on the interface adhesion of TPU/MVQ blends by the changes of the elongation at break, and the stress-strain curves are shown in **Figure S6**. Meanwhile, the mechanical data are

shown in *Table S1*.

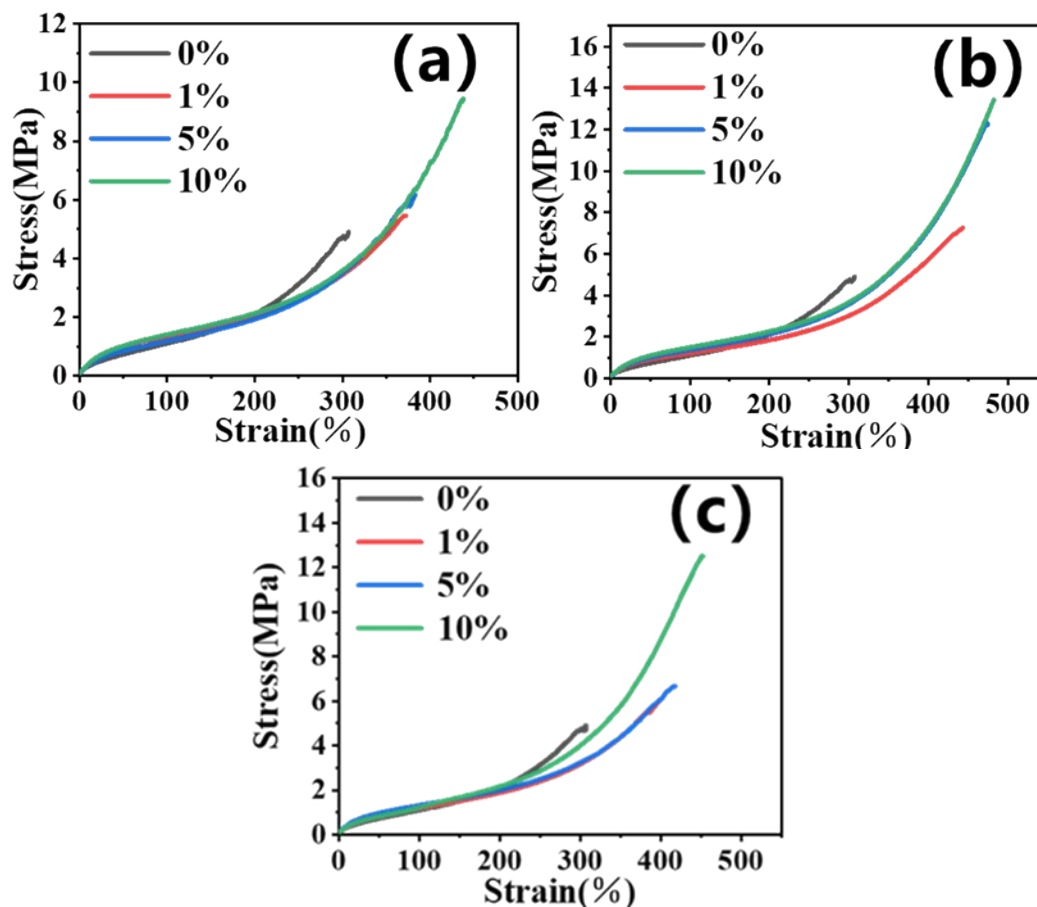

**Figure S6.** The stress-strain curve of the TPU/MVQ blends compatibilized by the compatibilizers with different PDMS content, (a) PU-PDMS-20%, (b) PU-PDMS-80%, (c) PU-PDMS-100%

**Table S1.** The tensile strength and elongation at break of TPU/MVQ/PU-PDMS-X blends

| Sample               | Compatibilizer dosage (wt.%) | Tensile strength (MPa) | Elongation (%) |
|----------------------|------------------------------|------------------------|----------------|
| TPU/MVQ/PU-PDMS-20%  | 0                            | 4.9±2.6                | 307±47         |
|                      | 1                            | 5.5±2.2                | 371±42         |
|                      | 5                            | 6.2±1.8                | 383±42         |
|                      | 10                           | 9.9±1.7                | 456±37         |
| TPU/MVQ/PU-PDMS-80%  | 1                            | 7.3±1.9                | 443±35         |
|                      | 5                            | 12.3±1.5               | 472±30         |
|                      | 10                           | 13.4±0.9               | 482±25         |
| TPU/MVQ/PU-PDMS-100% | 1                            | 6.0±2.1                | 397±42         |
|                      | 5                            | 6.7±1.7                | 418±37         |
|                      | 10                           | 12.5±1.3               | 451±33         |

*The average diameter of the TPU/MVQ blends compatibilized by PU-PDMS-80%. In order to verify whether PU-PDMS-80% compatibilizer also exhibits obvious effect in the preparation of TPV materials, the melt blending method is used in the preparation of the TPU/MVQ blends, which is similar as the conditions of dynamic vulcanization. The dispersion phase size distribution of the TPU/MVQ blends compatibilized by PU-PDMS-80% as shown in **Figure S7**.*

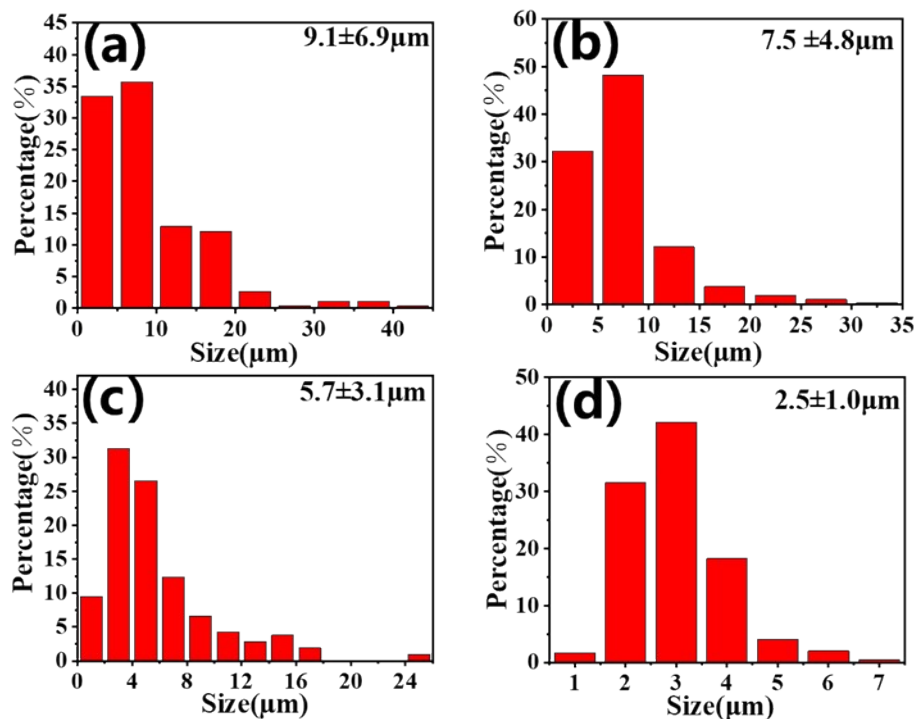

**Figure S7.** The dispersion phase size distribution of the TPU/MVQ blends compatibilized by PU-PDMS-80%, (a), (b), (c), and (d) represent the amount of compatibilizers addition is 0%, 1%, 5%, and 10%, respectively. The blends were obtained by melting blending.

## References

- [1] M. Sumita, K. Sakata, S. Asai, K. Miyasaka, H. Nakagawa. Dispersion of fillers and the electrical conductivity of polymer blends filled with carbon black, *Polymer Bulletin*, 1991, **25**, 265-271.
- [2] F. Fenouillot, P. Cassagnau, J.C. Majesté. Uneven distribution of nanoparticles in immiscible fluids: Morphology development in polymer blends, *Polymer*, 2009, **50**, 1333-1350.
- [3] N. Bitinis, R. Verdejo, P. Cassagnau, M.A. Lopez-Manchado. Structure and properties of polylactide/natural rubber blends, *Materials Chemistry and Physics*, 2011, **129**, 823-831.
